# Supplementary material for: A machine learning-based prognostic model integrating mRNA stemness index, hypoxia, and glycolysis‑related biomarkers for colorectal cancer
Source: Open Med (Wars). 2025 Sep 15;20(1):20251247. doi: 10.1515/med-2025-1247 (PMC12452079; doi:10.1515/med-2025-1247)
Supplement: Supplementary Table 1 [file med-2025-1247-sm1.xlsx]

## Sheet: Sheet1
ID
HIF1A
EGLN1
EGLN3
HIF3A
HIF1AN
VEGFA
EGLN2
EPAS1
VHL
ARNT
HYOU1
HILPDA
EPO
HIGD1A
CA9
TP53
EP300
SLC2A1
BNIP3
TNF
HMOX1
NOS1
PDK1
DDIT4
EDN1
BCL2
CITED2
NOS2
CREBBP
PTGS2
MYC
CXCR4
TIGAR
ADM
NDRG1
PGF
VEGFC
ANGPT2
LEP
RORA
MMP2
ANGPTL4
TH
FAM162A
EGR1
CXCL12
MGARP
NFE2L2
HK2
THBS1
MDM2
ALKBH5
PRKAA1
PPARG
SOD2
LOXL2
CAT
ENO1
PGK1
ERO1A
BNIP3L
TFRC
SIRT2
LIMD1
VEGFB
DPP4
ATM
NOL3
PPARA
MMP14
RBPJ
TGFB3
FOS
STC1
HMOX2
PLAU
ANG
AQP1
PLOD2
HSP90B1
VCAM1
AJUBA
CDKN1B
PDK3
TGFB2
WTIP
CAV1
IL1A
STC2
TLR2
KCNMA1
CEBPA
CYP1A1
SLC29A1
ATF2
APAF1
SLC11A2
CHCHD2
LONP1
AK4
P4HB
PIK3CB
STUB1
SMAD4
CARD16
PMAIP1
ADORA1
PINK1
PLAT
PTGIS
KCNMB1
HSF1
PDGFA
CBFA2T3
RGCC
JUND
RUNX1
CCNA2
MFN2
PSEN2
PLOD1
ITPR1
CD38
PPARD
TMBIM6
PML
ITGA2
BIRC2
ITPR2
IRAK1
PKM
GAPDH
LDHA
HK1
ENO3
TPI1
PFKP
GCK
PFKL
PFKFB3
PFKM
PGAM2
ALDOA
PKLR
HK3
ENO2
GPI
PGK2
PGAM1
LDHB
GAPDHS
PFKFB2
G6PD
PDHA1
PFKFB4
ALDOC
BPGM
ALDOB
FBP1
ADPGK
LDHC
PC
SLC2A3
G6PC1
SLC2A4
SLC16A1
FBP2
SDHB
PCK1
MPC1
EGFR
PGAM4
SLC2A2
MDH2
PFKFB1
HSPA5
TKTL1
CS
PRKACA
PCK2
GPD1
PPP2CA
MDH1
PDHB
PPP2R1A
GOT1
PPP2R5D
MPC2
ACLY
FH
IDH1
SOD1
GPD2
NUP133
SEC13
AAAS
NUP93
PDK2
NUP98
LDHAL6B
OGDH
CD44
GCKR
GSTP1
ECD
SLC37A4
PDHA2
DLD
SLC2A5
RB1
PGP
GOT2
NR4A1
PHGDH
NUP214
PRKACG
PPP2CB
GYS1
MYCN
ATP5F1D
MET
PRKACB
PPP2R1B
DLAT
PGM2L1
PPIA
KIF2A
NACC1
NDUFA1
IRS2
NUP188
SHMT2
SDHA
RANBP2
ACTB
SLC25A13
LHPP
SLC16A3
IDH2
AKR1A1
CXCL8
P4HA1
SLC25A6
NUP107
NUP155
NUP62
TPR
NUP153
NUP210
NUP85
GPAT3
NUP160
NUP88
RAE1
GNPDA1
NUP205
NUP50
GNPDA2
POM121
NUP37
NUP42
NDC1
NUP35
NUP54
NUP58
NUP43
SEH1L
GFAP
ALK
ALDH9A1
PRDM14
AURKB
PYGB
