# Supplementary material for: A machine learning-based prognostic model integrating mRNA stemness index, hypoxia, and glycolysis‑related biomarkers for colorectal cancer
Source: Open Med (Wars). 2025 Sep 15;20(1):20251247. doi: 10.1515/med-2025-1247 (PMC12452079; doi:10.1515/med-2025-1247)
Supplement: Supplementary Table 2 [file med-2025-1247-sm2.xlsx]

## Sheet: Sheet1
Only HGRGs	Only DEGs	HGRGs AND DEGs
EGLN3	CIP2A	HIF1A
HIF3A	TTK	EGLN1
HIF1AN	SPDL1	VEGFA
ARNT	PARPBP	EGLN2
HYOU1	KIF18A	EPAS1
EPO	SGO2	VHL
CA9	SRSF3	HILPDA
TP53	MRPL19	HIGD1A
SLC2A1	CDK1	EP300
TNF	SUV39H2	BNIP3
NOS1	MRPL3	HMOX1
DDIT4	TFAM	PDK1
BCL2	FBXO5	EDN1
MYC	C4orf46	CITED2
CXCR4	DLGAP5	NOS2
PGF	DNA2	CREBBP
VEGFC	MAD2L1	PTGS2
LEP	HAT1	TIGAR
MMP2	DBF4	ADM
TH	ZWILCH	NDRG1
CXCL12	AMD1	ANGPT2
MGARP	DEPDC1	RORA
HK2	ECT2	ANGPTL4
THBS1	NCAPG	FAM162A
ALKBH5	TMEM237	EGR1
PPARG	VRK1	NFE2L2
LOXL2	CHEK1	MDM2
CAT	SLF1	PRKAA1
LIMD1	DDIAS	SOD2
DPP4	EIF2S1	ENO1
TGFB3	GRPEL2	PGK1
PLAU	ABCE1	ERO1A
VCAM1	DEPDC1B	BNIP3L
CAV1	HMMR	TFRC
CYP1A1	CMSS1	SIRT2
SLC29A1	PNPLA2	VEGFB
SLC11A2	CENPK	ATM
P4HB	CCDC138	NOL3
CARD16	WDHD1	PPARA
ADORA1	METAP2	MMP14
RUNX1	SKP2	RBPJ
CD38	SRFBP1	FOS
PKM	PLK4	STC1
GAPDH	CSTF3	HMOX2
TPI1	NOC3L	ANG
GCK	IPO11	AQP1
PFKFB3	PPIL1	PLOD2
PGAM2	NPM1	HSP90B1
GPI	UBE2N	AJUBA
GAPDHS	SGO1	CDKN1B
PFKFB2	BUB1	PDK3
PFKFB4	LRRC40	TGFB2
SLC2A3	RAD51AP1	WTIP
G6PC1	GLMN	IL1A
FBP2	PPAT	STC2
EGFR	LIN9	TLR2
SLC2A2	HAUS6	KCNMA1
PFKFB1	GTF2H3	CEBPA
TKTL1	GLO1	ATF2
PPP2R5D	NAA15	APAF1
SOD1	GMNN	CHCHD2
AAAS	GSTCD	LONP1
LDHAL6B	ERCC8	AK4
GCKR	SASS6	PIK3CB
PDHA2	TRUB1	STUB1
SLC2A5	TRMT10C	SMAD4
PPP2CB	FANCM	PMAIP1
NDUFA1	MTHFD2	PINK1
NUP188	UTP11	PLAT
ACTB	GMPS	PTGIS
IDH2	G2E3	KCNMB1
TPR	PRIM2	HSF1
GPAT3	OLA1	PDGFA
GFAP	POLR3G	CBFA2T3
PRDM14	UTP15	RGCC
	ANLN	JUND
	SKA2	CCNA2
	NEDD1	MFN2
	DIMT1	PSEN2
	RBMX	PLOD1
	PRIM1	ITPR1
	MRPL30	PPARD
	CCNC	TMBIM6
	NUF2	PML
	BRMS1L	ITGA2
	KPNA2	BIRC2
	BRIX1	ITPR2
	WDR43	IRAK1
	YPEL3	LDHA
	USP1	HK1
	BUB1B	ENO3
	TOP2A	PFKP
	HOMER1	PFKL
	MRPL42	PFKM
	UCHL5	ALDOA
	ITGB3BP	PKLR
	DCLRE1A	HK3
	EHBP1L1	ENO2
	COPS2	PGK2
	HBS1L	PGAM1
	C12orf29	LDHB
	CCT2	G6PD
	TBC1D17	PDHA1
	TRNT1	ALDOC
	RSRC1	BPGM
	FANCB	ALDOB
	SSX2IP	FBP1
	ARSK	ADPGK
	GTPBP8	LDHC
	HNRNPC	PC
	ESCO2	SLC2A4
	CEP78	SLC16A1
	PMS1	SDHB
	SMIM13	PCK1
	CEP55	MPC1
	TNFRSF14	PGAM4
	EIF4E	MDH2
	TAF1B	HSPA5
	RSL24D1	CS
	PAICS	PRKACA
	ADK	PCK2
	CENPQ	GPD1
	AASDHPPT	PPP2CA
	RIOK2	MDH1
	PAK1IP1	PDHB
	PNO1	PPP2R1A
	MCM10	GOT1
	YWHAQ	MPC2
	SMC4	ACLY
	BICDL2	FH
	CCDC59	IDH1
	WDR75	GPD2
	MGRN1	NUP133
	SMC2	SEC13
	NOL11	NUP93
	KIAA1586	PDK2
	CDC7	NUP98
	ATG4C	OGDH
	ARHGAP11A	CD44
	PNPT1	GSTP1
	MNAT1	ECD
	RTKN2	SLC37A4
	MND1	DLD
	CCNB1	RB1
	RARS1	PGP
	CHAC2	GOT2
	BRIP1	NR4A1
	NMD3	PHGDH
	RPAP3	NUP214
	CKAP2L	PRKACG
	DCUN1D5	GYS1
	RNGTT	MYCN
	RAD54B	ATP5F1D
	ABTB1	MET
	MRPL47	PRKACB
	TSC2	PPP2R1B
	GOLT1B	DLAT
	SPC25	PGM2L1
	RPF2	PPIA
	RHBDF1	KIF2A
	RCN2	NACC1
	TRA2B	IRS2
	ZMPSTE24	SHMT2
	ARMT1	SDHA
	HNRNPLL	RANBP2
	WDR12	SLC25A13
	MELK	LHPP
	RMI1	SLC16A3
	RFC5	AKR1A1
	NAA50	CXCL8
	NLN	P4HA1
	MTREX	SLC25A6
	CEP57L1	NUP107
	RNPEPL1	NUP155
	DDX18	NUP62
	KIF11	NUP153
	C5orf34	NUP210
	MAP11	NUP85
	NEK2	NUP160
	TRADD	NUP88
	MEF2D	RAE1
	FBXW4	GNPDA1
	CDKN3	NUP205
	TPRKB	NUP50
	PBK	GNPDA2
	RFC4	POM121
	FBXO45	NUP37
	EEF1E1	NUP42
	KIF15	NDC1
	MYO7B	NUP35
	RACGAP1	NUP54
	GNPNAT1	NUP58
	FLYWCH1	NUP43
	NUSAP1	SEH1L
	DENR	ALK
	ZBTB7B	ALDH9A1
	TMPO	AURKB
	ZRANB3	PYGB
	CDHR5
	BARD1
	VBP1
	KIF20B
	NEIL3
	KRR1
	TOMM70
	CEP83
	ZCCHC9
	SUZ12
	TFEB
	ASF1A
	ARL14EP
	TIPIN
	SUB1
	ACTL6A
	MVP
	PSMA1
	COMMD8
	C11orf58
	ETF1
	AK6
	XPOT
	RAB40C
	HDAC2
	KIF23
	ARMC1
	EXTL2
	MIS18BP1
	PLEC
	UBE2E1
	YEATS4
	CENPE
	RAD1
	FKBP3
	PSMD14
	STRAP
	RPE
	PNPLA7
	AGPS
	PRKD2
	XPO1
	MRPL1
	RRM2
	MAPK8IP3
	MRS2
	DDX21
	TSC22D4
	CEP57
	DTD2
	NAP1L1
	RRM1
	TJP3
	TMTC3
	ANAPC10
	CENPL
	LYAR
	DNAJC24
	L2HGDH
	C2orf69
	VPS26A
	TMA16
	TTC26
	MTBP
	CDC5L
	EIF3M
	MAST3
	PTGES3
	HAUS1
	GMIP
	G3BP1
	PAQR3
	COMMD2
	TECPR1
	STAT6
	BCAS2
	POLE2
	SCLT1
	HAUS2
	PPIL4
	ZER1
	MICALL2
	CDC23
	SCOC
	VTA1
	ASNSD1
	TMEM127
	DSCC1
	ARL6
	BLM
	BZW1
	PSMD12
	WDR36
	WDR3
	PPID
	PSD4
	TCP1
	TNPO1
	FIGNL1
	EML3
	PRKRA
	NUDT21
	VPS9D1
	ALG6
	ERH
	CWC27
	MCM6
	PDCD10
	EXOSC9
	LLPH
	ICE2
	ROGDI
	PRMT3
	TSEN15
	CDC27
	OGFOD1
	TARS1
	ARHGAP27
	CPSF2
	CACYBP
	KNL1
	SMNDC1
	ULK1
	SIDT2
	PPP1CC
	HSF2
	IARS1
	DGKQ
	ALG10
	FASTKD2
	PSMC6
	MICAL1
	POLD4
	TBC1D31
	CCNE2
	ZC3H15
	UBA3
	DDX20
	RBM27
	CCDC43
	H2AZ1
	OSTC
	DYNC1LI1
	LRCH4
	NIFK
	EXO1
	EIF3J
	TWISTNB
	PDHX
	NAE1
	ZNF670
	MPHOSPH6
	CTNNAL1
	GCFC2
	FAM204A
	RAB11B
	PSMA3
	ACTR6
	GRN
	MRPS10
	ARL13B
	CPSF3
	USP20
	TOLLIP
	SENP1
	MRPS22
	CDC6
	HDAC5
	CYCS
	COMMD10
	CENPN
	SERINC2
	CENPI
	NAA60
	CYB5R4
	TTC22
	FAM161A
	SYNCRIP
	LRRC75B
	SRSF1
	SHLD3
	KNSTRN
	BTF3L4
	C18orf54
	DTL
	CCT4
	MDM1
	UBA5
	TICAM1
	ATG2A
	NUS1
	FAM133B
	PCLAF
	DCUN1D1
	ORC3
	EXOC5
	DCK
	PGM2
	SERBP1
	NDUFAF4
	CENPA
	CBX7
	SMPD3
	PCNP
	PKD1
	LSM5
	GFM1
	TAF9
	INTS13
	ZSWIM8
	MTRF1L
	RAN
	MAPK3
	NOL10
	SELENOI
	RETREG2
	CENPH
	BCAR1
	FAM102A
	LRR1
	TMX1
	CTDSPL2
	ARL5A
	CCDC58
	POLR2M
	BUB3
	NEK4
	EPS8L2
	IPO7
	RIOK1
	SRP72
	NSL1
	PIGW
	RRP15
	MANEA
	CTDSP1
	CACFD1
	PHF6
	RWDD4
	PLEKHM1
	SLBP
	SMN1
	LSM3
	MED6
	PIP5K1C
	MSH2
	LRPPRC
	PACRGL
	ZUP1
	BCCIP
	WDR41
	DIAPH3
	PLRG1
	LTV1
	HPF1
	NUDCD1
	ZW10
	FASTKD3
	HAUS3
	SRSF7
	TOM1
	HPRT1
	SGSH
	TMED5
	B3GALT4
	POLR2D
	BAIAP2L2
	SMARCAD1
	SMAD5
	ZNF639
	INAVA
	UBE2K
	SHQ1
	FANCI
	TSN
	PTCD2
	SSH3
	CEBPZ
	SSR3
	MASTL
	MIB2
	MTPAP
	RFC3
	VRK2
	CKS2
	MOB4
	MED15
	PRPF40A
	MCMBP
	ERCC6L
	UTP18
	UBE2V2
	PCGF6
	THAP12
	TCEA1
	CETN3
	HNRNPR
	SOCS4
	MTMR2
	NCBP1
	CLSPN
	SRP9
	ZFP1
	ARHGAP45
	MAFK
	WDR89
	HECTD3
	TRAPPC13
	BBS7
	METRNL
	MZT1
	NBN
	RPF1
	ZBTB48
	KBTBD8
	MAK16
	TIMM23
	DTWD1
	ATAD2
	SLC30A5
	NUDCD2
	ERI2
	NIP7
	TRIM59
	CALCOCO1
	LTBP4
	RXRA
	DDX52
	PRDX3
	PSIP1
	PRR11
	UBA2
	FAR1
	MMS22L
	XRCC5
	PSMD6
	GFM2
	HSPD1
	TRMT11
	EPS8L1
	TMEM63B
	COX11
	NISCH
	DNTTIP2
	ZBTB6
	ZNF213
	PLXNA3
	C1orf112
	C5orf24
	MAGOHB
	DBT
	XRCC2
	COPS8
	GTPBP10
	TRDMT1
	SRPK1
	PHTF2
	CENPU
	TMED2
	ZBTB7A
	CNIH1
	GTF2H2C
	POLK
	INAFM1
	MXD4
	TPCN1
	CIAO2A
	IFT81
	NT5DC1
	CKAP2
	GIN1
	EFCAB7
	TRIP13
	MRPL50
	CCDC18
	CDC40
	BICRA
	ITGB4
	SSB
	ELMOD2
	LSM6
	SRSF2
	PITPNM1
	SNX33
	ABCA7
	PHF1
	TRIT1
	GMFB
	ALDH3B1
	PWP1
	NCAPH
	ZNF695
	IDUA
	ABHD10
	CHORDC1
	TWF1
	CEP20
	GTF2H1
	TEFM
	CNKSR1
	MAU2
	MTF2
	PPP4R2
	IL17RC
	STK26
	UTP6
	RPAP2
	EXOC6
	NCOR2
	CBX3
	DDR1
	UBA7
	YAF2
	RBBP4
	PDE12
	PTPN23
	ZWINT
	PLXNB2
	SMARCA5
	PTPRH
	ZNHIT6
	SIPA1
	IRAK1BP1
	MORF4L2
	TUBGCP6
	VIPR1
	CCNH
	TIMM17A
	LYPLA1
	ERGIC2
	HSPA4
	ATAD5
	MADD
	ATL2
	ABCC3
	MTHFD2L
	TMEM175
	TOPBP1
	NEPRO
	DARS1
	MSH6
	DHX15
	STMN1
	MNS1
	C10orf88
	MPHOSPH9
	NKAPD1
	SLC22A18
	SIRT7
	CFAP97
	TRIAP1
	MCOLN1
	PPP1R12C
	CAPN15
	IMMP1L
	MRPL39
	ZNF280C
	CAAP1
	CRTC2
	ARHGEF10L
	GNAI3
	NAA25
	CENPS
	CDCA2
	CAND1
	RFX1
	FAM98B
	PIGK
	PSMA4
	IQSEC2
	LAMB3
	NARS2
	KPNA4
	MRPL35
	ZFYVE28
	ATG9A
	TDG
	PPIP5K2
	SMARCE1
	RPL7L1
	MRPL33
	DDX10
	FBXO31
	MAP3K11
	METTL15
	ABCG1
	SNAPC1
	CRY2
	GPT
	AMDHD2
	HELLS
	STXBP2
	LYRM2
	CAPN5
	SMIM8
	CIC
	FAM214B
	SMIM15
	UBA6
	ZBTB11
	DDX50
	GEMIN5
	SNRPG
	SIPA1L3
	TMEM33
	ELP4
	NAF1
	CBWD2
	METTL6
	TNK2
	TRIM37
	AIMP1
	GPN3
	TRMT5
	DTWD2
	CCT6A
	STIL
	API5
	ALS2CL
	KATNBL1
	MBD6
	SINHCAF
	RALGDS
	PDZD3
	TXNDC9
	RAD18
	CEP97
	CHUK
	DDX1
	PTPN6
	TCIRG1
	PAIP1
	GINS3
	SLC30A6
	TFB2M
	HACD3
	SLC38A9
	IL4R
	CDK2
	GDI2
	DENND6B
	MTFR2
	HOOK1
	DHX36
	METAP1
	LRRC8B
	CLIP2
	OTUD6B
	RPL5
	TAF1A
	PRPS2
	SNX6
	SLC25A32
	ZNF316
	SHCBP1
	GINS1
	ACP1
	MED21
	KHDRBS1
	MED16
	PUM3
	DDX46
	DPH5
	ELL
	PEX3
	TUBD1
	DNAJC10
	UTP20
	SELENOF
	SUMO2
	MINDY1
	INTS2
	WBP2
	ASPM
	DR1
	WDCP
	UBLCP1
	DUSP8
	GEMIN2
	SVIP
	GRSF1
	SREK1IP1
	ZNF367
	ORC4
	OPA1
	CSE1L
	SLC39A13
	FAM234A
	RPGRIP1L
	SH2B1
	PUS7L
	ZNF865
	SIN3B
	MOCS2
	C12orf60
	CAPRIN1
	DNAJB2
	VILL
	FOXN2
	LZTFL1
	THAP1
	PAPOLG
	MRPL32
	TYK2
	VSIR
	PTK6
	SRSF10
	METTL8
	HMGB3
	GLRX3
	C5orf22
	E2F7
	LARS1
	CCDC15
	SNRNP27
	D2HGDH
	ZNF92
	ACE
	ARRDC2
	FAM111B
	KIF14
	TAOK2
	MTCH2
	SDHD
	NDC80
	CDK7
	SRPRB
	C3orf33
	CNPPD1
	DBR1
	SLC12A9
	DHX57
	TMEM259
	GART
	MTX2
	NFYB
	CLASP2
	PPHLN1
	GAS2L3
	TBCA
	SF3A3
	MOB3C
	SBNO2
	CYRIB
	CIBAR1
	SAAL1
	SPPL2B
	ZNF286A
	TOM1L2
	STX4
	MYNN
	IL17RE
	TMC4
	FAM72A
	ERCC4
	DNM1L
	FBLIM1
	EXD3
	RTRAF
	LARP4
	SLC30A9
	RNF138
	SCFD1
	RIOX2
	COQ3
	WDR76
	MTIF2
	CCDC120
	HS2ST1
	HMGXB4
	CGN
	KIF20A
	FCSK
	TYW3
	SEMA4G
	SPIRE2
	RAPGEF6
	TERF1
	AGPAT5
	CDK18
	NSA2
	COA7
	C16orf87
	LIN52
	METTL5
	TBC1D22A
	SCAMP1
	BLOC1S6
	ORC6
	CCAR1
	MRPS27
	CARD10
	PI4K2B
	ISOC1
	TMED7
	CDIPT
	SRP19
	MAPK7
	MNT
	RABL3
	WDR81
	VASH2
	CUL5
	TNRC18
	LRRC58
	CCNB2
	ATF1
	METTL21A
	MIS18A
	MMADHC
	ZNF138
	DHFR
	TRMT13
	NR1H2
	DOCK6
	DCAF17
	SH3GLB2
	ZNF100
	AP3M1
	PTTG1
	SLC9A3R2
	SEPTIN1
	ZSCAN12
	CEP128
	TAF13
	GAK
	HOOK2
	PRKCI
	GEN1
	MRPS35
	SPAST
	QTRT2
	LMNB1
	ZNF22
	DESI2
	PAOX
	SMC6
	ODC1
	PWWP2B
	MOB2
	SEMA3B
	RBM7
	CRY1
	NDUFAF2
	DAB2IP
	DIPK2A
	PDS5A
	LMBR1L
	CCT8
	POLR3F
	BIRC5
	ZMYM1
	CRTC1
	THUMPD3
	COX7A2L
	GNA11
	UBXN2A
	AGGF1
	PARP10
	FBXO30
	CASP8AP2
	CCP110
	PUS7
	ARRDC1
	MSANTD4
	LYRM7
	MROH1
	MRTFA
	ZFYVE1
	TIMM9
	DARS2
	BRI3
	DNM2
	SUMO1
	VWA7
	THOC7
	NEMP1
	AGL
	CBX1
	SET
	RPRD1A
	C21orf91
	RIPK3
	SSBP1
	ILF2
	CHRNA5
	CYBC1
	MARCHF7
	RINT1
	EIF3E
	LRP5
	LMF1
	BCLAF1
	THAP9
	AKNA
	RAB33B
	KIF4A
	GDI1
	ZNF131
	FBRS
	FANCL
	INF2
	NDUFA5
	C1D
	MFN1
	MYCBP
	FASTKD1
	RAD17
	ZNF770
	MFSD14B
	RYK
	PARG
	PLA2G10
	DNAL1
	AZI2
	DPH6
	SC5D
	DHX29
	CHAD
	U2SURP
	HSPA13
	SFI1
	ANAPC2
	EIF1AX
	OCIAD1
	TEF
	RPP40
	TIPRL
	ARSA
	CLNS1A
	MTFR1
	BZW2
	HELZ2
	GTDC1
	IER3IP1
	SF3B6
	C3orf38
	UBE3D
	UHRF1BP1L
	JUP
	PLCD1
	LMF2
	ATG5
	AUNIP
	ZFYVE16
	AGFG2
	RBBP8
	IGSF9
	GSPT1
	ETAA1
	TBC1D19
	TMEM126B
	GNL3
	SLC4A7
	FAM160B2
	SLC25A34
	EVI5L
	PSMA2
	ECHDC1
	EIF2A
	CLCN7
	CEP44
	SRP54
	GPR153
	SKA1
	ZNF184
	CCDC66
	CDK10
	BRCA1
	DEDD2
	AP5M1
	STYX
	GABPA
	HSPE1
	GUF1
	ATP2A3
	UBE2T
	CHCHD3
	ATP6V0A1
	PNPLA6
	CSNK1D
	CLDN4
	NCAPG2
	CAMTA2
	HMGB1
	ZNF684
	TTC27
	DEK
	VPS29
	CTSD
	CUL2
	FCHSD1
	PRKCD
	CHEK2
	USP15
	LPIN3
	PRORP
	PLA2G6
	UBE2D2
	HDAC10
	CDKAL1
	TMEM94
	DEPDC4
	GABPB1
	PPP3R1
	PPP1R13L
	TMEM167A
	ALKBH8
	ENOPH1
	FCF1
	ZMYM4
	LRRCC1
	FAM160A2
	FZD3
	AP5Z1
	METTL14
	PLD2
	RPS6KB1
	EXOC3L4
	STXBP4
	SHROOM1
	MBOAT7
	PSME4
	SNRPE
	TMEM67
	TMEM267
	PRR12
	ZGRF1
	CTPS1
	TEX9
	PBXIP1
	SNRPB2
	TATDN1
	ORC5
	SPG7
	PGAP6
	ITPKC
	ZCCHC7
	ATG12
	MYH14
	DHRS3
	GTPBP4
	SCYL2
	MIS12
	SIKE1
	POGLUT3
	CNOT7
	POLQ
	CHPF2
	C11orf68
	PLEKHM2
	MIDN
	ZNF273
	PCDH1
	OSBPL5
	ALAD
	CEP135
	RAPGEF1
	GPR180
	RBM12
	CCDC130
	C1QTNF12
	POLR2K
	HIP1R
	LCORL
	ANKRD9
	FAM3A
	SDCBP2
	GNPTG
	ARAP1
	FBXW5
	ZCCHC10
	VAMP7
	GATC
	RBMXL1
	ZNF35
	CNOT6
	E4F1
	DENND3
	HYI
	ZZZ3
	WWP2
	ABHD17A
	CPSF6
	UNC93B1
	NKIRAS1
	AGAP3
	MFSD14A
	SYNPO
	ZSWIM4
	FAM98A
	LZTR1
	TCF25
	AMBRA1
	ZNF180
	UBE3A
	SCAP
	TRIM3
	ITGA3
	ARPP19
	COPS3
	UBXN6
	RBBP5
	NAA35
	IKBIP
	NIT1
	CLTB
	ERI1
	TMEM161B
	CENPP
	SMIM30
	IGSF8
	DPY30
	PIGA
	SFXN1
	USP45
	GIGYF1
	NBL1
	NAA30
	GPR108
	SLC25A42
	LYSMD3
	PUS3
	WASHC4
	DAPK3
	KLHL8
	SNX16
	PREPL
	SEC22A
	SLC66A1
	TNFRSF1A
	TLE5
	SUN2
	TBK1
	ZFR
	CAPZA1
	PLXNB1
	SSR1
	GPATCH11
	PAFAH1B2
	HPCAL1
	CYTH1
	POLE3
	DNAJC4
	AKIRIN1
	KCNK6
	FAM216A
	CANX
	MINK1
	TRIM23
	THAP5
	ZNF513
	TRANK1
	HNRNPK
	COPB1
	ABCA2
	PCNX4
	SLC12A7
	SH3BP5L
	UNKL
	MARK2
	LSM12
	ZFAND2B
	MAN2B2
	TEX10
	AASDH
	MAP3K10
	INPP5K
	STK11
	TAF5
	TUBE1
	AJM1
	PPP1R8
	ATXN10
	FAM83E
	WTAP
	TESK1
	KDM6B
	ZRANB2
	GBF1
	AMMECR1
	RAD23B
	NOP58
	ARL6IP1
	GTF3C3
	SNX3
	RAB11FIP3
	TRAF1
	SHFL
	HSD17B12
	CWF19L2
	RPS3A
	SDAD1
	ACSF3
	DOK4
	EFNA1
	CNOT10
	N4BP2
	DONSON
	BRCA2
	SPCS3
	CHML
	TSNAX
	ATP13A3
	TBPL1
	WDTC1
	TTC21B
	RAB28
	DUSP11
	GRAMD4
	PA2G4
	CISD2
	CBFB
	ZNF146
	PACS1
	TRIM8
	NFXL1
	NAGPA
	CD82
	GPATCH2
	TBC1D15
	SPIN4
	PRPF39
	STT3B
	POT1
	TNFRSF25
	ZNF714
	SLC25A29
	KPNA5
	SHLD2
	TBC1D25
	MGLL
	PIK3C2A
	ZNF214
	GTPBP1
	ZFAND1
	TTC7A
	CBWD1
	NDUFB5
	COIL
	PIGF
	ZFYVE27
	EIF5
	ZCCHC4
	KITLG
	RABEP2
	SPINT1
	SIRT6
	TMEM123
	YME1L1
	LPAR2
	MTERF3
	MYO1B
	FPGT
	ZNF680
	LCAT
	PTK2B
	BTF3
	RHOG
	MTAP
	MARCHF5
	LARP1B
	ZNF451
	PRKD3
	ZBTB41
	LRRC8D
	TNS2
	LRSAM1
	MARCHF2
	PIGQ
	NASP
	TIFA
	SACM1L
	SLC25A17
	URGCP
	CDC123
	SELENOT
	ATP6AP1
	AOC1
	SCX
	TRMT10A
	ZC3H3
	WDR13
	FUBP1
	CCSAP
	MRPL13
	FBXL8
	ACP2
	RHOT2
	MPHOSPH10
	ZNF354A
	SLC45A4
	CARNMT1
	LTBP3
	AFG1L
	PSAT1
	SENP6
	GNL2
	HMGN3
	CCDC159
	TENT2
	ISCA1
	RANBP10
	ADCY9
	SPATA5
	TINAGL1
	EVPL
	UMPS
	VPS28
	MRPS16
	ARMC10
	ATP2C1
	TGS1
	NEK1
	PDZK1IP1
	HPS1
	UTP23
	MAPK6
	FKBP8
	ZNF322
	AXIN1
	HSPA9
	ARHGEF1
	ZAP70
	SGTB
	KPNB1
	ZDHHC1
	MYO9B
	TMX3
	CD151
	FAIM
	LENG8
	WEE1
	PTPN18
	AP3S1
	CORO7
	POLR2B
	PRIMPOL
	DHX9
	RERE
	INTS7
	HDAC11
	RAB4B
	C2CD2L
	RIF1
	UBE2W
	CEP170B
	MOB1A
	FANCD2
	RLF
	PRSS8
	CTSA
	BAIAP2L1
	UNG
	THAP2
	USP37
	ASAH2B
	ARL6IP6
	OGFR
	CCNJ
	ST6GALNAC6
	CDC73
	PRPF18
	POLR1B
	SGSM2
	CDC25A
	SYVN1
	MRPS30
	CASZ1
	GCLM
	KMT2B
	MAP1S
	ABCD1
	ZBTB8A
	CNBP
	GTF2A1
	TMEM120A
	TMBIM1
	CYHR1
	PPP6R2
	CROCC
	GTF2E1
	PPP1R16A
	ZBTB17
	ARL5B
	HGS
	EBNA1BP2
	TMUB2
	USP14
	EZH1
	PPT1
	TMEM135
	MED25
	C2orf49
	HACE1
	OSBPL7
	COG7
	RAD21
	RRAS
	EPN1
	OAF
	NUMA1
	KPNA1
	CWC22
	LMNTD2
	CACNB3
	SLC38A10
	CFAP36
	KIF3A
	THUMPD2
	UBE2D1
	NIPSNAP2
	TMEM44
	GPR35
	USP13
	PITPNM2
	NGEF
	NADK2
	FARSB
	CNOT9
	LRP10
	APOBR
	CDC25C
	KLHL15
	ZNF358
	METTL2A
	MRPS9
	GTF2A2
	KIAA0586
	MTHFD1L
	MRPL44
	PEX13
	RAPGEF3
	TMEM63A
	GGA3
	QRSL1
	DNAJA2
	ANAPC4
	ACVRL1
	PLXNA2
	CPTP
	SLC33A1
	MCPH1
	SNRNP48
	EZH2
	SKA3
	DGCR2
	PCMT1
	AGPAT3
	CCNB1IP1
	IREB2
	UBALD1
	CEP120
	MAP3K7
	EAF1
	MRPS36
	CISD1
	OSBPL8
	ELMO3
	CFAP410
	MTO1
	SPATS2
	TOMM22
	CCDC34
	METTL25
	BOLA3
	MAP2K7
	RASAL3
	MED17
	USF2
	GGCT
	MUC20
	PPP2R5E
	CHMP1A
	EXOC7
	GPRC5C
	SH2D3A
	XRCC4
	CCDC61
	CCDC82
	RAB17
	ZNF724
	ST6GALNAC4
	C12orf4
	SFPQ
	OSGIN2
	PTPN11
	IFT80
	SPACA4
	BDP1
	RAPGEFL1
	RASGRP2
	KNTC1
	NIBAN2
	SNRPD1
	DNAJB14
	EED
	SPA17
	ZNF687
	USP46
	FAM114A2
	PPA2
	UBE2D3
	PHAX
	SBF1
	C17orf75
	BCL3
	SLC22A23
	UBTD2
	AEBP2
	GNB2
	FRMD8
	HSP90AA1
	TRPM4
	COPS4
	PPDPF
	HACD2
	ANKRD13D
	USP28
	ZNF644
	TAF1D
	GMCL1
	SLC25A46
	IBTK
	IL22RA1
	CLASRP
	NOXA1
	SAMD15
	NOL7
	EEF1AKMT2
	MMP28
	CLSTN1
	ZNF319
	ZNF107
	RFK
	GINS4
	ACBD4
	DRD4
	CENPF
	ANAPC1
	MCM9
	CPOX
	FZR1
	TFB1M
	RBM18
	C8orf37
	SRBD1
	FOXO4
	CALM2
	PPL
	RECQL
	FASTK
	ZNF430
	SPRTN
	CRIPT
	TTC33
	LRFN3
	FAM91A1
	APPL1
	RPP30
	MFAP3
	TXNDC16
	RAB10
	KIAA0513
	CORO1B
	PRPS1
	FAM76B
	PI4KB
	SEC11A
	LSR
	ZNF335
	FAM210A
	GSN
	IRF2BPL
	ZNF646
	MIGA2
	RABGGTB
	LBR
	LPCAT4
	MAIP1
	PPIG
	GRK2
	PDCD2
	ATN1
	CASKIN2
	PTBP3
	PTCD3
	TXNDC12
	CPNE5
	NRBF2
	LGALS9
	SNX2
	TEAD3
	G3BP2
	KIAA1522
	PAWR
	ABRAXAS2
	BET1
	TSKU
	IFFO1
	PPP2R3C
	SETD1B
	GPBP1
	SLC48A1
	DNASE1
	KIN
	SMPD1
	DBNL
	EFNA2
	UBXN4
	ARHGEF11
	LARGE1
	RAD51C
	RPL24
	ATP11C
	SLC44A4
	ARHGAP1
	ACAP3
	EFHD2
	ZNF484
	RSL1D1
	SLC66A2
	ZNF195
	CGGBP1
	ABHD8
	FBXL15
	NRAS
	PRRG2
	MORF4L1
	DNAH14
	LSM11
	TBC1D23
	POLA1
	PPP1R26
	SUPT16H
	GXYLT1
	HJURP
	SHISA5
	BBS10
	DMPK
	ATP6V0D1
	SLC8B1
	IRF7
	MYO15B
	NBEAL2
	RELB
	SEPTIN2
	ZGPAT
	RWDD1
	THBS3
	IDE
	RAB24
	EXOG
	TMEM8B
	ATP5PB
	LIN54
	PSMD11
	PIH1D2
	INIP
	ZMIZ2
	PRMT9
	THUMPD1
	CBR4
	AMN
	ZBTB21
	MCF2L
	FAM172A
	PLCD3
	TP53I13
	AHCTF1
	PRC1
	TEX30
	LIN7C
	AP4E1
	DCP2
	NFKB2
	MEGF6
	MITD1
	CRACR2B
	MMD
	OSBPL9
	RRN3
	NCKAP1
	RNASEH1
	RCHY1
	CCNT1
	BTG3
	DPH3
	CCDC77
	INPPL1
	ZBTB22
	TYW5
	PYURF
	ARHGEF16
	NATD1
	ATG4B
	ZBTB24
	HEATR1
	KYAT3
	SEPTIN7
	ATP13A1
	AURKA
	ADAMTS10
	MOB3A
	RPA3
	TMEM150A
	ARFIP1
	SCAI
	USP8
	AQR
	MAST2
	UBALD2
	CCNG1
	ZNF688
	FAM193B
	SLC38A6
	ZNF862
	SETD1A
	CAPZA2
	TIMM8A
	ST7L
	CRACDL
	GTF3C4
	LLGL2
	EHD1
	GAS6
	IPMK
	RAP1GDS1
	PDLIM2
	CEP70
	TXNRD1
	MPP6
	RPL6
	CHPF
	EFCAB11
	AAGAB
	SELENOO
	PCNX3
	SMU1
	GBA
	ARFRP1
	EXOC3
	CDC42EP5
	LPAR5
	ODF2L
	GAL3ST1
	SPTY2D1
	CDC37L1
	ANP32E
	AIDA
	OTUD5
	EIF4G2
	KMT5C
	ACSS2
	RNF2
	ADAT3
	POGLUT1
	SLC27A3
	ADAP1
	C18orf21
	HSPA8
	HAGH
	TMEM219
	EVA1B
	HMGCR
	SPTLC1
	PXYLP1
	UEVLD
	CTSZ
	ZDHHC21
	ZNF675
	FAM53B
	GBE1
	PPP1R37
	RBM45
	SNRNP40
	TMEM184A
	AMN1
	ESD
	NOLC1
	SPATA2L
	CDHR2
	ARAF
	BCL9L
	SLC9A1
	KCNH2
	POR
	RAB6A
	XRN2
	MBLAC2
	SLC31A1
	SLC25A36
	ADGRE5
	DENND6A
	ZNF519
	RNF8
	PTPN4
	TRPM7
	UBQLN1
	WDR24
	TRIOBP
	SPG21
	AP2A2
	RARA
	SLC25A45
	SLC26A6
	MSH3
	ADSS2
	CHD1
	MIER1
	TRMT61B
	YBX1
	BLVRB
	LIMS1
	RBL1
	THAP6
	COL17A1
	CDC42BPG
	PLAA
	FBXO22
	ZNF500
	ZNF654
	ADAL
	SFR1
	BMPR1A
	CAPN1
	NOL8
	VPS35
	SCAMP2
	TM4SF5
	ZNF414
	PSMC1
	BLOC1S5
	SP4
	RFLNA
	DTX2
	PLD3
	MPND
	TMEM54
	TMEM209
	TMEM126A
	E2F5
	METTL4
	UBR7
	GPAM
	FRS2
	PAPOLA
	ZNF799
	ARMC8
	ZMYM6
	PLEKHG5
	ZNF124
	ACHE
	KPNA3
	TBC1D10B
	FAM72D
	RFNG
	RHOT1
	CEBPZOS
	HSD11B2
	DHX40
	MED7
	UFL1
	DVL1
	KIFC2
	CYB5R3
	BRI3BP
	GINS2
	BORCS6
	C1orf109
	BAIAP3
	STEAP1
	ZDHHC6
	TAF1C
	STARD4
	GIPR
	NR1D1
	ABHD18
	DCAF13
	HDHD3
	SMC5
	EML2
	RMND1
	CSNK1G3
	KLHL28
	MMP15
	FAAP100
	ASB3
	CEP41
	AZIN1
	USP33
	RANBP1
	DENND4B
	AP5B1
	CHMP2B
	SAR1A
	CREB1
	PNKD
	GARS1
	UQCRH
	RRAS2
[truncated: 9,737 more rows]
